# Supplementary material for: The genomic architecture and molecular evolution of ant odorant receptors
Source: HighWire-hosted journal article supplement (doi:10.1101/gr.237123.118), 2018-09-24
Supplement: Supplemental_methods.docx [file Supplemental_methods.docx]

**The genomic architecture and molecular evolution of ant odorant receptors**

Sean K McKenzie & Daniel J C Kronauer

**Supplemental Methods**

**Sequencing**

We sequenced DNA on a Pacific Biosciences (PacBio) RSII using 27 SMRT cells, as well as on an Oxford Nanopore MinION using two version 9.4 flow cells. Mean read length of the PacBio reads was 5,366bp and the N50 read length was 7,398bp. Mean read length of the Nanopore reads was 7,607bp and N50 read length was 17,133bp. One MinION flow cell was first used for Lambda DNA sequencing and then washed according to standard Oxford Nanopore protocols before being loaded with clonal raider ant DNA. To prevent Lambda DNA contamination, reads from this flow cell were first aligned to the Lambda phage genome and aligning reads excluded from downstream analysis. Additionally poor quality reads (average quality < 8) were excluded, and PoreChop (<https://github.com/rrwick/Porechop>) was used to split chimeric reads and remove adapter sequences.

**Annotation**

As described in Oxley et al. (2014), chemosensory genes were manually annotated using evidence from sequence homology, exon structure conservation, and RNA-seq. Briefly, full gene models from the past assembly were aligned to the new assembly using Exonerate (Slater and Birney 2005), and individual exons were aligned to the new assembly using tblastn (Altschul et al. 1990). These data were loaded into the Apollo genome browser (Lee et al. 2009) and used to manually construct gene models. In cases where exon boundaries were unclear or exons were too short to reliably detect with homology searches (e.g. the first exons of OR subfamilies U and T), we used RNA-seq junctions generated by aligning RNA-seq data from McKenzie et al. (2016) to the new assembly using TopHat (Trapnell et al. 2009). Additionally, automated gene models (see below) were screened to find potential novel, highly divergent OR loci by blasting all genes with 5-10 transmembrane domains as predicted by phobius (Käll et al. 2004) and 2x gene expression enrichment in antennae vs heads, legs, and bodies (from RNA-seq data in McKenzie et al. 2014) against the NCBI non-redundant protein database. One divergent OR was identified in this manner, while all other candidate genes belonged to other known protein families. This highly divergent OR does not belong to any OR subfamily defined by Zhou et al. (2012), thus we erected the new OR subfamily “XA” for this gene. Blastp against the RefSeq gene sets of other ants shows that this is likely a single-copy OR subfamily missed in the original manual annotations of ant ORs (Smith et al. 2011b, 2011a; Oxley et al. 2014) and therefore missed in the subsequent automated annotations of ant ORs (Zhou et al. 2012, 2015; Engsontia et al. 2015).

For automated annotation using MAKER2 (Holt and Yandell 2011), we used the AUGUSTUS gene prediction software (Stanke et al. 2006) trained on the previous *O. biroi* genome. For training AUGUSTUS, we compiled a set of genes from the NCBI RefSeq annotation that met the following criteria: 100% coverage by RNA-seq data (as used in the RefSeq annotation; see [www.ncbi.nlm.nih.gov/genome/annotation_euk/Cerapachys_biroi/101/](http://www.ncbi.nlm.nih.gov/genome/annotation_euk/Cerapachys_biroi/101/)), 90% gap-free global alignment to a *Drosophila melanogaster* gene (from *D. melanogaster* FlyBase release 6, as determined by the ggsearch tool of the FASTA package by Pearson and Lipman (1988)), and at least 1kbp from the nearest gene (so as not to confound intergenic vs. genic training). Augustus was trained on these gene models using the optimize_augustus.pl script from the Augustus release. NCBI *O. biroi* RefSeq (v101) gene alignments (aligned using Exonerate) which had a 90% optimal Exonerate score and which represented complete gene models (began with ATG and ended with a stop codon) were also passed to Maker2 as potential gene models. Protein homology hints were generated by aligning the longest isoforms of each gene from FlyBase release 6 of the *D. melanogaster* genome and RefSeq genes from *Apis mellifera*, *Nasonia vitripennis*, *Vollenhovia emeryi*, and *Ooceraea biroi* using Exonerate with a 20% score threshold. RNA-seq hints were generated by mapping antennal RNA-seq datasets to the assembly using the STAR alignment program (Dobin et al. 2013), assembling these reads into transcripts using Cufflinks (Trapnell et al. 2010), and extracting ORFs from these reads using Transdecoder (<https://github.com/TransDecoder/TransDecoder/>).

**Odorant receptor annotation transfer**

To transfer OR annotations from previous versions of the honeybee, jewel wasp, and fire ant genome assemblies to the more complete, chromosome-level assemblies now available, we used the protein2genome function in Exonerate (Slater and Birney 2005). A 90% score threshold was used to ensure correct mapping, and in the rare case of multiple maps with a score greater than 90% the highest scoring hit was selected. For the fire ant, a FASTA file of the assembly scaffolded using RAD-seq linkage (described in Wang et al. (2013)) was provided by John Wang and Oksana Riba-Grognuz (pers. com.). Manual OR annotations and RefSeq annotations were mapped to this assembly using Exonerate as described above, except that RefSeq annotations were mapped with a 70% score threshold with the best hit for each gene returned using the “-bestn 1” option. ORs were removed from RefSeq annotations by excluding RefSeq genes with blastp hits against OR protein sequences (with an evalue < 0.01) or which had genomic coordinates overlapping manual OR annotations.
